# Supplementary material for: Nitrate Utilization Promotes Systemic Infection of Salmonella Typhimurium in Mice
Source: MDPI journal article supplement (doi:10.3390/ijms23137220), 2022-06-29
Supplement: s1 [file s1]

# Nitrate Utilization Promotes Systemic Infection of *Salmonella* Typhimurium in Mice

Wanwu Li <sup>1,2</sup>, Linxing Li <sup>1,2</sup>, Xiaolin Yan <sup>1,2</sup>, Pan Wu <sup>1,2</sup>, Tianli Zhang <sup>1,2</sup>, Yu Fan <sup>1,2</sup>, Shuai Ma <sup>1,2</sup>, Xinyue Wang <sup>1,2</sup>, and Lingyan Jiang \*

- <sup>1</sup> The Key Laboratory of Molecular Microbiology and Technology, Ministry of Education, Nankai University, Tianjin 300457, China; wanwuli@mail.nankai.edu.cn (W.L.); lilinxing19@mail.nankai.edu.cn (L.L.); 2120211278@mail.nankai.edu.cn (X.Y.); wupan2016@mail.nankai.edu.cn (P.W.); 1120180080@mail.nankai.edu.cn (T.Z.); 1120170077@mail.nankai.edu.cn (Y.F.); 2120191113@mail.nankai.edu.cn (S.M.); wangxinyue1120200566@mail.nankai.edu.cn (X.W.);
- <sup>2</sup> Tianjin Key Laboratory of Microbial Functional Genomics, TEDA Institute of Biological Sciences and Biotechnology, Nankai University, Tianjin 300457, China
- \* Correspondence: jianglingyan@nankai.edu.cn

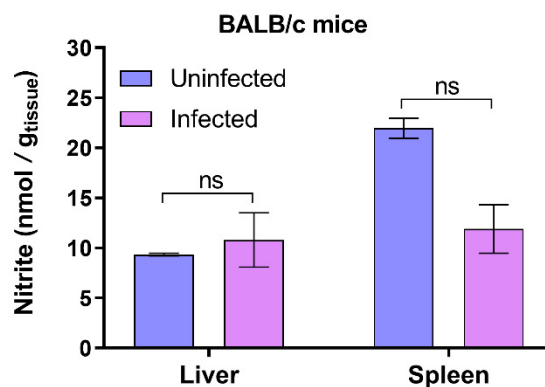

**Figure S1.** Nitrite levels are not significantly altered during *S. Typhimurium* systemic infection. Nitrite levels were tested in the livers and spleens of BALB/c mice that were infected or mock-infected with *S. Typhimurium* WT strain after 5 days post-infection. Data were generated from three independent experiments and are presented as the mean  $\pm$  SD. *p*-values were determined using unpaired Student's *t*-test (ns, not significant).

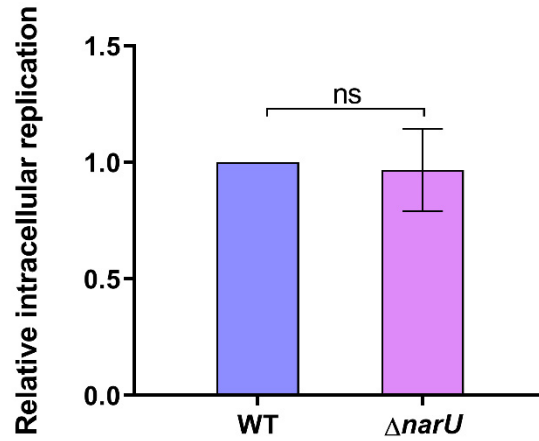

**Figure S2.** The mutation of *narU* did not significantly influence the replication ability of *S. Typhimurium* in macrophages. Replication of *S. Typhimurium* WT and  $\Delta narU$  in RAW264.7 cells. The bacterial replication ability was determined according to the ratio of the number of intracellular bacteria at 20 h post-infection to the number of bacteria at 2 h post-infection. Data were generated from three independent experiments and are presented as mean  $\pm$  SD. *p*-value was determined using unpaired Student's *t*-test (ns, not significant).

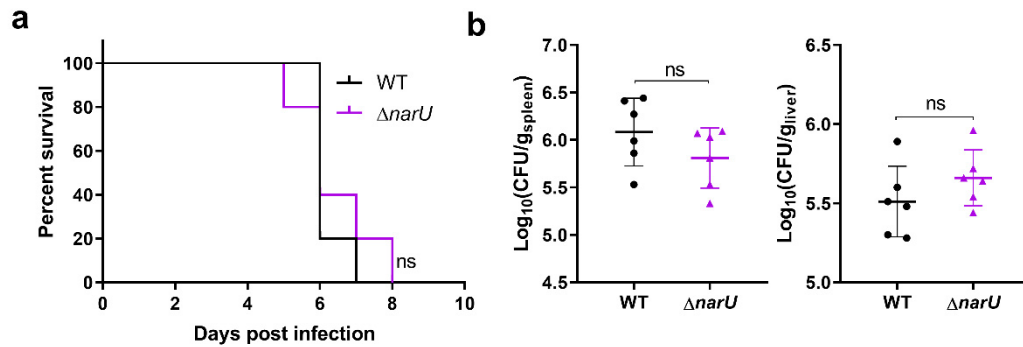

**Figure S3.** The mutation of *narU* did not significantly influence the systemic virulence of *S. Typhimurium*. (a) Survival curves for mice infected i.p. with the *S. Typhimurium* WT or  $\Delta narU$ , *n* = 5 mice/group. (b) Liver and spleen bacterial burdens in mice infected with the *S. Typhimurium* WT or  $\Delta narU$  at day 5 post-infection. *n* = 6 mice/group. (a and b) Data were combined from two independent experiments and are presented as mean  $\pm$  SD. *p* values were determined using log-rank Mantel–Cox test (a) or Mann–Whitney U test (b) (ns, not significant).

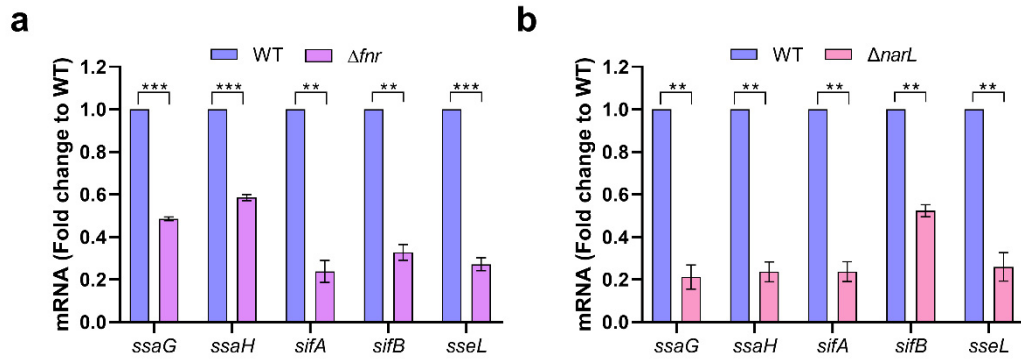

**Figure S4.** Mutation of *fnr* or *narL* decreased the transcription of T3SS2-related genes. (a and b) qRT-qPCR analysis of the mRNA levels of 5 T3SS2-related genes in *S. Typhimurium* WT,  $\Delta fnr$  mutant (a), or  $\Delta narL$  mutant (b). Bacteria were grown in N-minimal medium for 6 h prior to collection. Data were generated from three independent experiments and are presented as mean  $\pm$  SD. *p*-values were determined using unpaired Student's *t*-test (\*\**p* < 0.01; \*\*\**p* < 0.001).

**Table S1.** Primers used in this study

| Targets                                         | Primer sequences (5'-3')                                                                   |
|-------------------------------------------------|--------------------------------------------------------------------------------------------|
| Primers for qRT-PCR analysis                    |                                                                                            |
| 16S rRNA                                        | ACTGGCAGGCTTGAGTCTTGTAGA                                                                   |
| <i>sifA</i>                                     | GGCACAACCTCCAAGTAGACATCG<br>AGGACATTTAGATGGGTGGAAAGCG<br>TATGTGGGTATGCGGTGGTGGTAT          |
| <i>sifB</i>                                     | GTTGCTTGTTCCCTGAGCGGTTA<br>GTCAATAGCTGTTACACCTGCCTGG                                       |
| <i>ssaG</i>                                     | ATATGCTCTCCACATGGCGCACCA<br>GCGCTTTAATCATCGATTCTGGGTTGAGCA                                 |
| <i>ssaH</i>                                     | CGGGCGTTAACCATAGCCTGATTT<br>TGGTGCAGGAAATAACAGACGCAG                                       |
| <i>sseL</i>                                     | ACAGGAGATCACTGGCTTCTCTGTT<br>CCACAGCCGTTGGGTACATTGTT                                       |
| <i>narK</i>                                     | ATCCTCATCGTGCCCTGCGTAT<br>TATTGCCAGACCACCGTTCAGA                                           |
| <i>narG</i>                                     | CGTTCTAACCTGCTTGGGTCTTCC<br>CATTGTCACGCCACTCCACTTCTT                                       |
| <i>napF</i>                                     | CATCGTTGCCAGGACAGTTGTGA<br>GCATGGTGGTTCTCCGCTTTGAT                                         |
| Primers for the establishment of mutant strains |                                                                                            |
| $\Delta narK$                                   | ATATCAACTTACCTTCGGCAGTAAACCCTAATGTGGCAGACATCAAATC<br>AAGAATCAGAGGTGTCTGTGTAGGCTGGAGCTGCTTC |

---

|                                                                         |                                                     |
|-------------------------------------------------------------------------|-----------------------------------------------------|
|                                                                         | GTATGTTGTAATAAATACAGATAAAAAAAGCGCGGTCTAACGCCGC      |
|                                                                         | GCAAAGGATAATCAAAAGCATATGAATATCCTCCTTAG              |
| <i>ΔhmpA</i>                                                            | TGCAAGGGTATTTTTATAAGATGCATTTGATATACATCATTAGATTTTCA  |
|                                                                         | CATAAAGGAAGCACGTGTGTAGGCTGGAGCTGCTTC                |
|                                                                         | GAACGGGGAGGAAAACGGGCGTTCGCCTTAACGATAACGCCCGTTTTT    |
|                                                                         | TCAGAGGATTTGTTGCAACATATGAATATCCTCCTTAG              |
| <i>ΔnarU</i>                                                            | GAGCGCGTGACGCTCTGTCTCTTTTTTGTGTTTTTCTTCAAATGATATGCG |
|                                                                         | CATGTGAGGGGTAAAGTGTAGGCTGGAGCTGCTTC                 |
|                                                                         | TTCCGCCATCCTGTGCGATTTGGCGTTAAACCATTACCGGATGGCCGTCCT |
|                                                                         | ACAGGTGCGTATGTTGCATATGAATATCCTCCTTAG                |
| <i>Δfnr</i>                                                             | AGACTTACGCGCTACCAAAAAGATGTTAAAATTGACAAATATCAATT     |
|                                                                         | ACGGCTTGAGCAGACCTGTGTAGGCTGGAGCTGCTTC               |
|                                                                         | CCAGATCAATAAATGAGAAAAATTTAACGATATGGCAGAAGATAACAT    |
|                                                                         | CAATGGTTTAGCTGACGCATATGAATATCCTCCTTAG               |
| <i>ΔnarX</i>                                                            | GCCGATTGACGCCCTCTTTTTTGCTACGTTTTTTCGGCGACATTACCCC   |
|                                                                         | GAAGAAAGAAGGTAACGTGTAGGCTGGAGCTGCTTC                |
|                                                                         | GCTGCTTTACACCCGTGCGTAGCATCGGATGGTCATCGATTAACAGGAT   |
|                                                                         | GGTTGCCGGTTCCTGACATATGAATATCCTCCTTAG                |
| <i>ΔnarL</i>                                                            | CGGAACAGAGGTCACTGTTACTTTTATTCCAGAAACAACTTCACAGA     |
|                                                                         | AACCCAGGGAGATACCCGTGTAGGCTGGAGCTGCTTC               |
|                                                                         | TGACTGAACCGTTTATCACGATGCCGGACGATAATCCGCATTGGCAACC   |
|                                                                         | GTTCCAGGAGCAATAACATATGAATATCCTCCTTAG                |
| Primers for the pET-28a- <i>narL</i> plasmid construction               |                                                     |
|                                                                         | CCATGGGCATGTTTAAACGGTGTTTCTCTCCTCTTACG              |
|                                                                         | CTCGAGAAAGATGCGTTCCTGATGTACCCAG                     |
| Primers for the amplification of DNA sequences used in EMSA experiments |                                                     |
| <i>narK</i>                                                             | AGCAAAAAGAGGGGCGTCA                                 |
| <i>promoter</i>                                                         | CGACACGATGGCCGCG                                    |
| <i>narG</i>                                                             | CGGCAGGGCTAACCACG                                   |
| <i>promoter</i>                                                         | CCTCCCAGTCCCGGTTTGT                                 |
| 16S                                                                     | AAATTGAAGAGTTTGATCATGGCTC                           |
| rDNA                                                                    | GCATGGCTGCATCAGGCTT                                 |

---
